# Supplementary material for: An Efficient Method to Prepare Barcoded cDNA Libraries from Plant Callus for Long-Read Sequencing
Source: MDPI journal article supplement (doi:10.3390/mps6020031), 2023-03-15
Supplement: s1 [file s1]

## Sequence length distribution

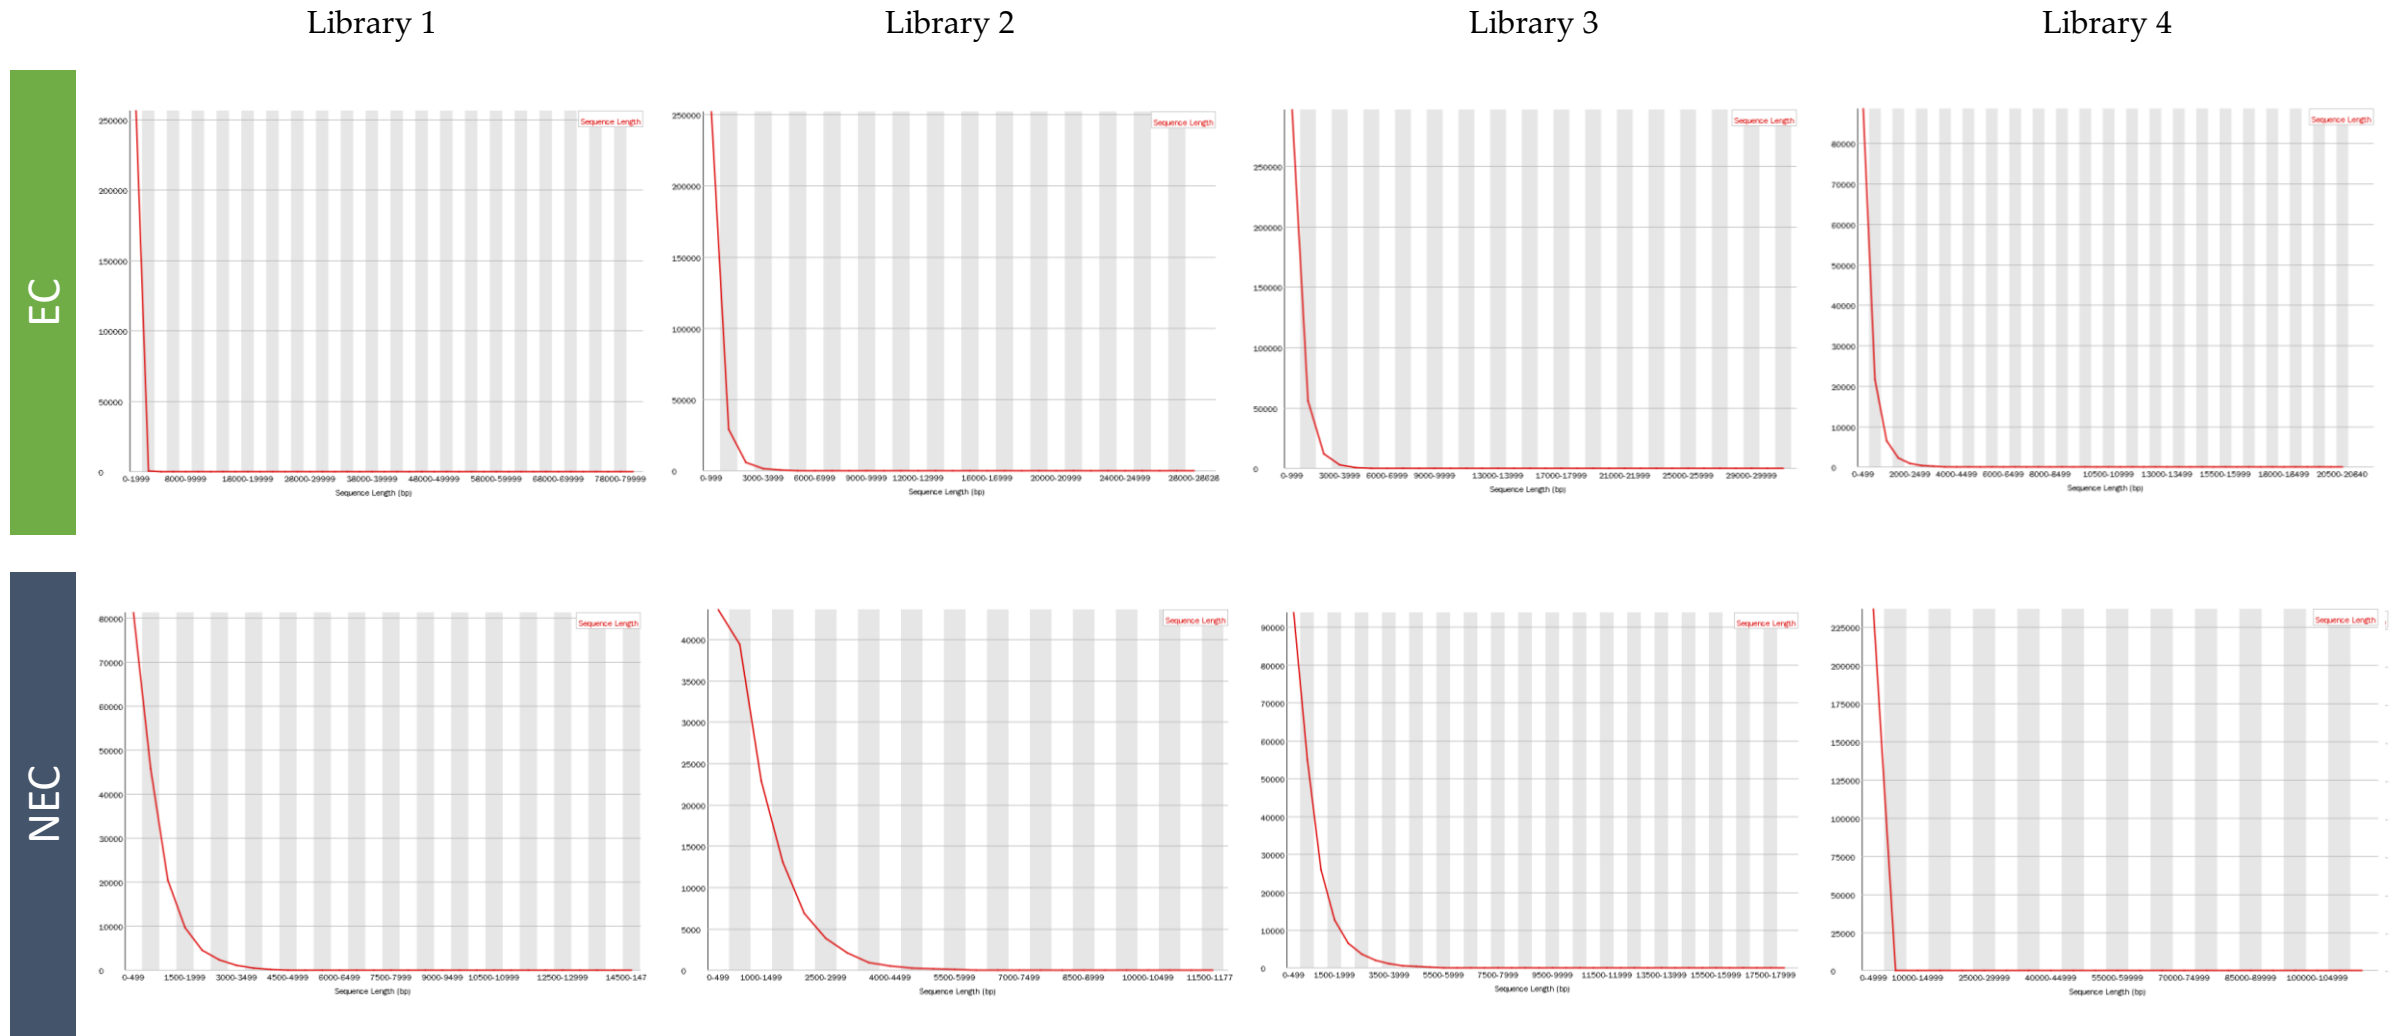

**Figure S1.** Distribution of sequence lengths, over all sequences of long-reads, generated from barcoded cDNA libraries, of *S. betaceum* compact embryogenic callus (EC) and friable non-embryogenic callus (NEC), by MinION sequencing from Oxford Nanopore Technologies®.

### Duty time gruped

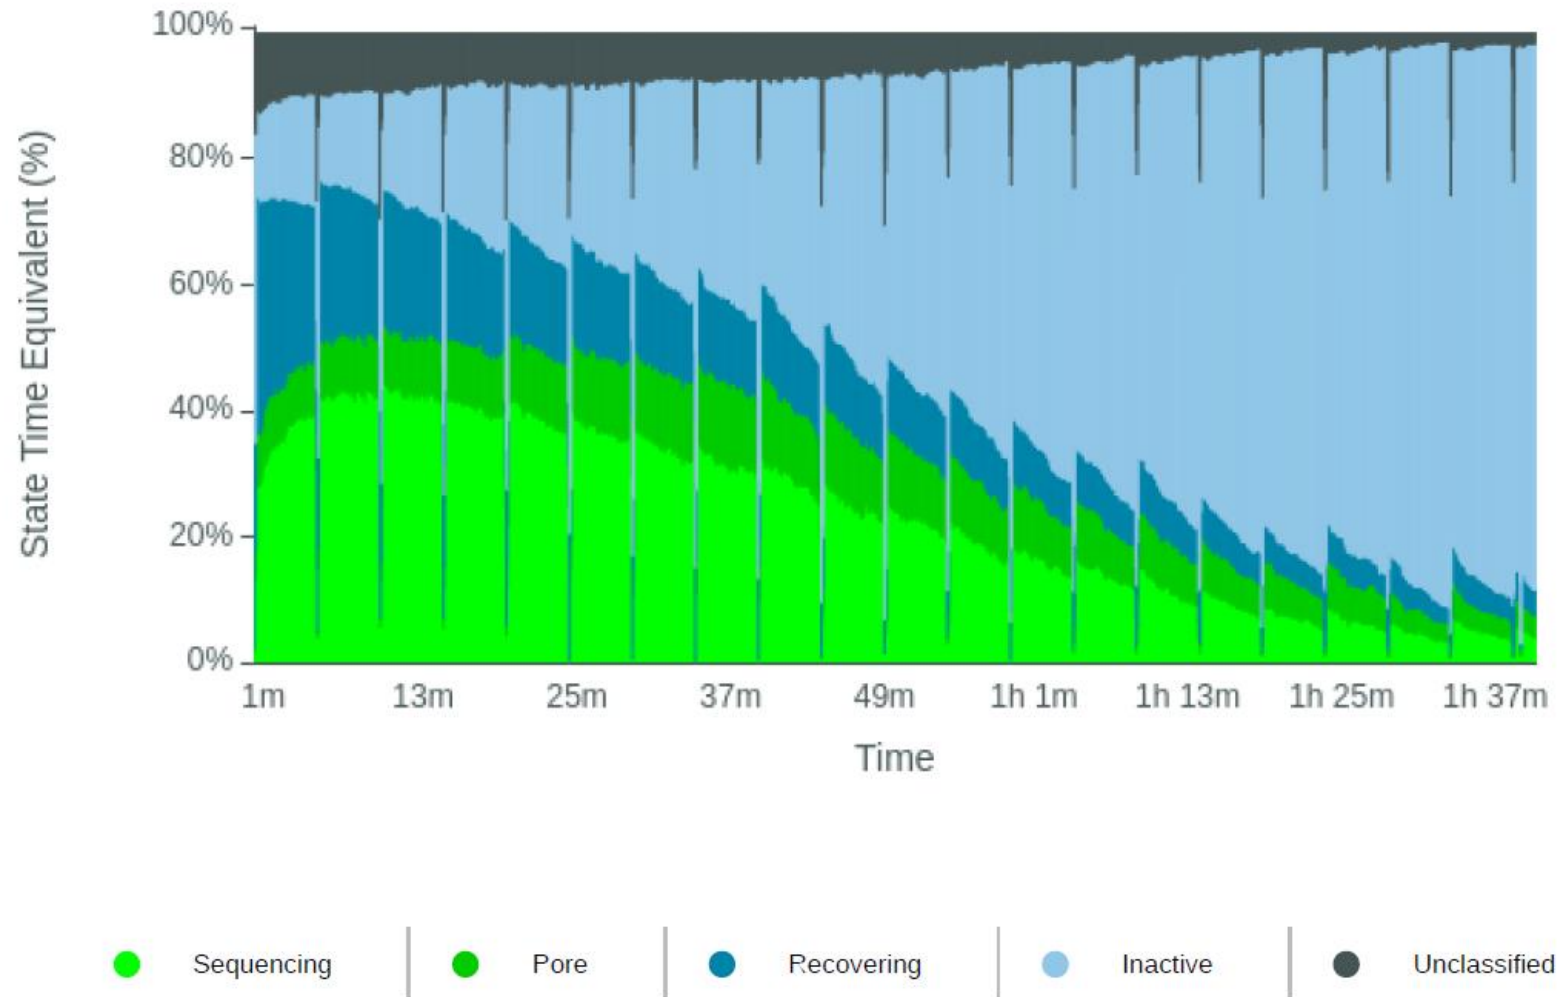

**Figure S2.** Duty time plot, obtained by MinKNOW to access the quality of run carried out by MinION sequencing from Oxford Nanopore Technologies®.
